# Supplementary material for: Metabolic signature and response to glutamine deprivation are independent of p53 status in B cell malignancies
Source: PubMed Central journal article supplement — iScience. 2024 Mar 28;27(5):109640. doi: 10.1016/j.isci.2024.109640 (PMC11053310; doi:10.1016/j.isci.2024.109640), 2024-03-28
Supplement: mmc1.pdf [file mmc1.pdf]

iScience, Volume 27

## **Supplemental information**

### **Metabolic signature and response to glutamine deprivation are independent of p53 status in B cell malignancies**

**Chiara Montironi, Zhenghao Chen, Ingrid A.M. Derks, Gaspard Cretenet, Esmée A. Krap, Eric Eldering, and Helga Simon-Molas**

## Supplemental information titles and legends

**Figure S1: p53 loss confers a survival advantage to DNA damage-induced cell death but does not dictate changes in metabolic activity or growth in malignant B-cells, Related to Figure 1.** (A) PGA-1 cells with different *TP53* status were treated with various concentrations of fludarabine for 24 hours, viability was measured by flow cytometry using Mito-O/To-Pro-3 staining (N=3). Data are presented as mean  $\pm$  SEM and differences were analysed with two-way ANOVA with Tukey's multiple comparisons test (\* $p < 0,05$ ). \**TP53KO* #1 vs WT, #*TP53KO* #2 vs WT, \$*TP53KO* #3 vs WT. (B) LME-1 cell lines were subjected to 5 Gy IR, and 48 hours later viability was assessed by flow cytometry using Mito-O/To-Pro-3 staining (N=1). (C) Metabolomics analyses were performed after 48h of culture in all cell lines, as shown in Figure 1B. Pathway topology analysis was performed by grouping all samples according to p53 status (*TP53WT* N=6, *TP53KO* N=9) using MetaboAnalyst v5.0. X-axis represents the impact of the pathway on the differences between *TP53WT* and KO, Y-axis shows  $-\log_{10}(p\text{-value})$ . Node size is relative to pathway impact and colouring is based on p-value. (D) Relative abundance of PPP intermediates in each cell line is shown, each dot represents an independent sample. (E) *TP53WT* and *TP53KO* cells were cultured in complete RPMI medium for 48 h and Seahorse Mito Stress Test was performed. Basal OCR and basal ECAR were measured (PGA-1 N=6; OCI-Ly10 N=2, LME-1 N=2, Nalm-6 N=2). Each dot represents an independent sample. W: WT, M: Mock. (F) *TP53WT* and *TP53KO* cells were cultured in complete medium, growth rate was measured by counting cells with CasyCounter over time (Nalm-6, N=2 (presented as mean  $\pm$  SEM); PGA-1, N=1; OCILy10, N=2; LME-1, N=1).

**Fig S2. *TP53* loss does not rewire glucose metabolism in PGA-1 cells, Related to Figure 2E.** PGA-1 WT, MOCK, *TP53KO* #1 and #2 cells were cultured in complete media or glutamine deprivation (Gln-) for 24h and subsequently incubated in the presence of 5mM  $^{13}\text{C}_6$ -Glucose. Mean enrichment indicates the  $^{13}\text{C}$ -labelled fraction of a given metabolite relative to the total amount of that metabolite within a sample. WT cells grown in complete media had to be excluded from the analysis due to low quality of MS peaks. Additional data regarding nucleotide synthesis is shown in Figure 2E.

**Fig S3. Glutamine deprivation induces the integrated stress response pathway in malignant B-cell lines, Related to Figure 3.** Cells were cultured in control media or glutamine deprivation (Gln-) for A) 24 hours or B) 72 hours before RNA extraction. *CHOP* and *ATF4* mRNA levels were measured by RT-qPCR. (N=1).

**Table S1. Raw data from pathway analysis, Related to Figure 1C.** Pathway analysis was performed on cell-line specific metabolites (see heatmap, Fig. 1C) using MetaboAnalyst 5.0. A cut-off of  $FDR < 0.061$  was applied, pathways above the threshold are listed.

**Table S2. CGH analysis of cell lines, Related to Figure 1.** CGH array was performed on genomic DNA from all cell lines and also from PGA-1 and Nalm-6 TP53KO. Alterations were identified and listed.

# Figure S1

**A**

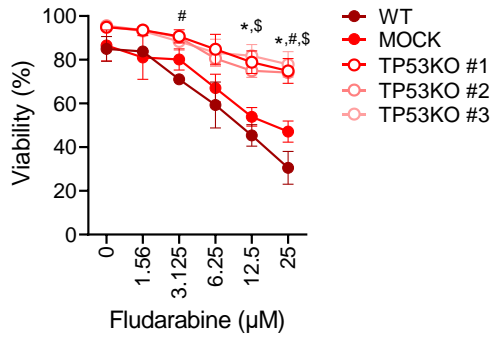

**B**

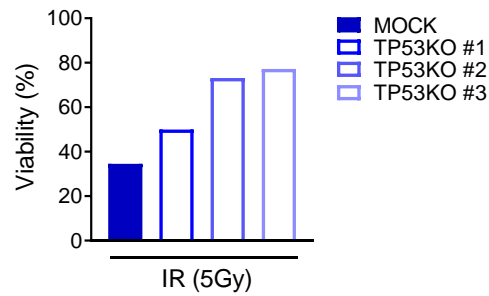

**C**

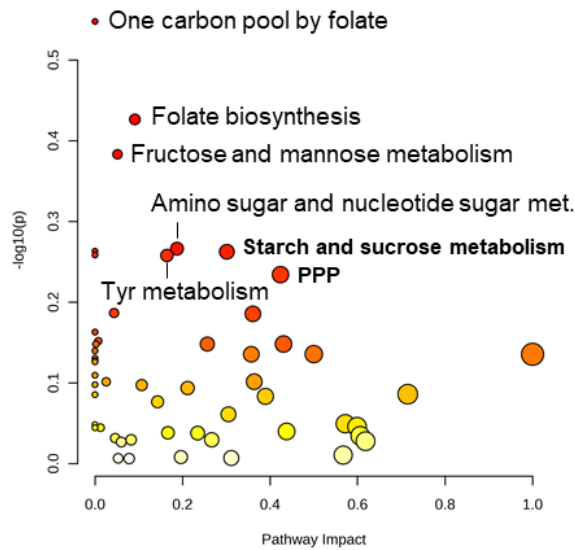

**D**

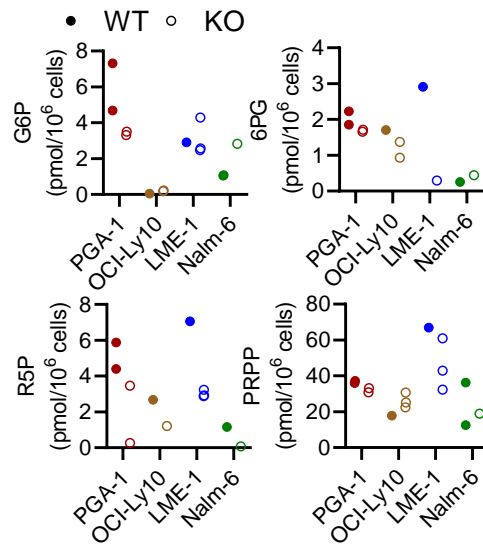

**E**

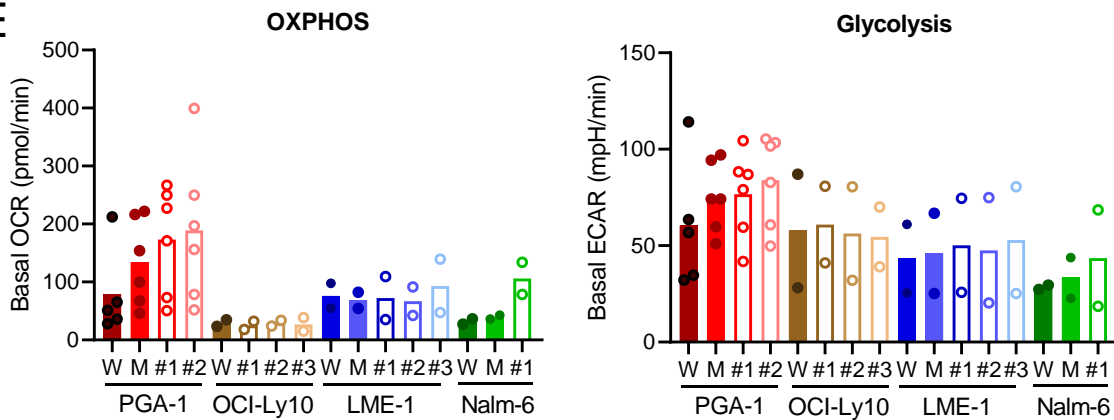

**F**

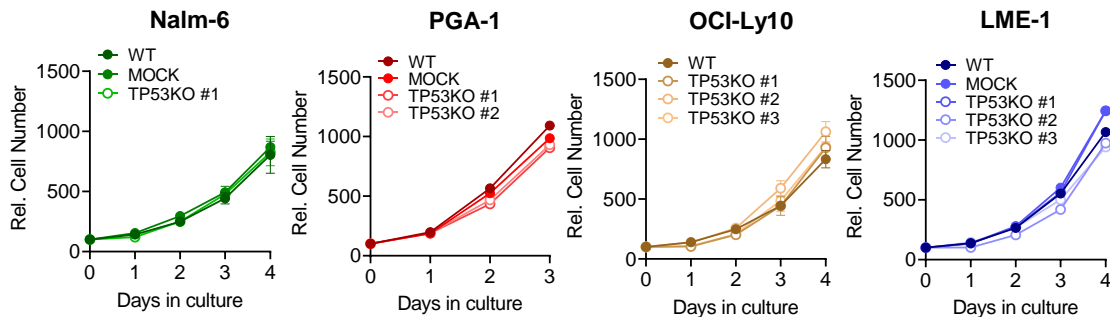

# Figure S2

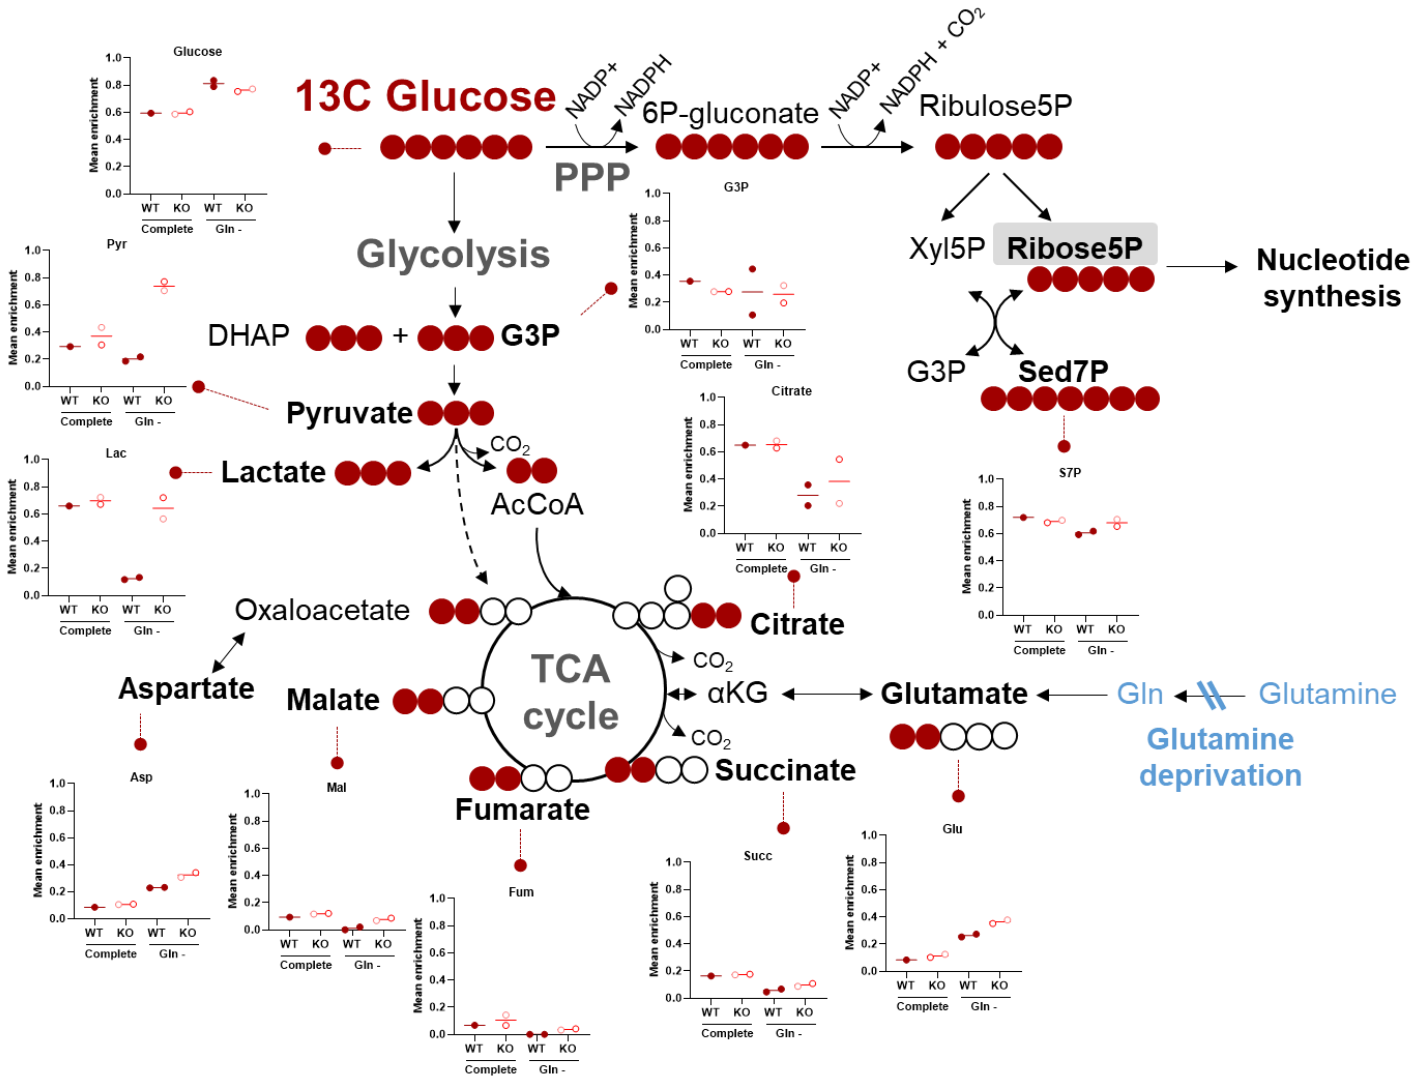

# Figure S3

A

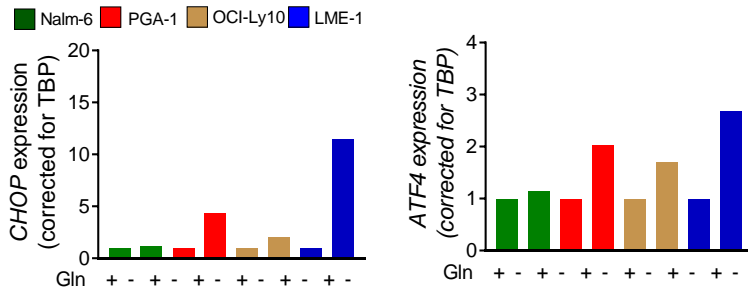

B

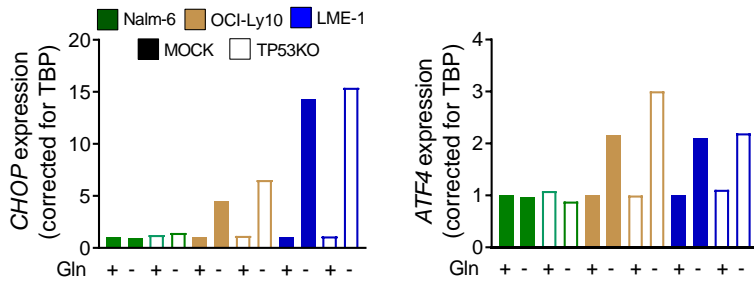

**Table S1**

| <b>Cell line</b> | <b>Pathway</b>                              | <b>FDR</b> |
|------------------|---------------------------------------------|------------|
| <b>PGA-1</b>     | Aminoacyl-tRNA biosynthesis                 | 5.33E-07   |
|                  | Purine metabolism                           | 1.63E-06   |
|                  | Arginine biosynthesis                       | 0.000156   |
|                  | Alanine, aspartate and glutamate metabolism | 0.001013   |
|                  | Citrate cycle (TCA cycle)                   | 0.001013   |
|                  | Glutathione metabolism                      | 0.006463   |
|                  | Arginine and proline metabolism             | 0.026901   |
|                  | Valine, leucine and isoleucine biosynthesis | 0.026901   |
| <b>OCI-Ly10</b>  | Glutathione metabolism                      | 0.008541   |
|                  | Butanoate metabolism                        | 0.00969    |
|                  | Arginine and proline metabolism             | 0.00969    |
|                  | Synthesis and degradation of ketone bodies  | 0.014774   |
|                  | beta-Alanine metabolism                     | 0.014774   |
|                  | Alanine, aspartate and glutamate metabolism | 0.02911    |
| <b>LME-1</b>     | Purine metabolism                           | 0.001349   |
| <b>NALM-6</b>    | Alanine, aspartate and glutamate metabolism | 0.060941   |
|                  | Glyoxylate and dicarboxylate metabolism     | 0.060941   |
|                  | Glycine, serine and threonine metabolism    | 0.060941   |

# Table S2

| Cell line              | CGH analysis                                                                                                                                                                                                                                                                                                                                                                                                                                                                                                                                                                                                                                                                                                                                                                                                                                                                                                                                                                                       | N° alterations |
|------------------------|----------------------------------------------------------------------------------------------------------------------------------------------------------------------------------------------------------------------------------------------------------------------------------------------------------------------------------------------------------------------------------------------------------------------------------------------------------------------------------------------------------------------------------------------------------------------------------------------------------------------------------------------------------------------------------------------------------------------------------------------------------------------------------------------------------------------------------------------------------------------------------------------------------------------------------------------------------------------------------------------------|----------------|
| Nalm-6                 | arr[GRCh37] 5q31.3q33.1(141139631_150060364)x1[1.0],(9p)x2 hmz,9p21.3(20314006_22342373)x0[0.9]                                                                                                                                                                                                                                                                                                                                                                                                                                                                                                                                                                                                                                                                                                                                                                                                                                                                                                    | 3              |
| PGA-1                  | arr[GRCh37] (2)x2 hmz,3q26.1q29(164216758_197851986)x3[1.0],(6)x1[0.35],(12)x3[0.45],13q21.1q3 3.2(58053767_105805914)x3[0.95],13q34(112592793_115107733)x1[0.95], (15)x2 hmz,16q11.2q24.3(46464488_90163275)x2 hmz                                                                                                                                                                                                                                                                                                                                                                                                                                                                                                                                                                                                                                                                                                                                                                                | 8              |
| OCI-Ly10               | arr[GRCh37] (X)x1[0.8],2p25.3p13.1(12770_74306073)x3[0.8],2q13q37.3(111743145_24277591 0)x2 hmz,3p26.3p24.3(61891_23610434)x4[0.7], 3p22.2p21.31(37107696_46803420)x3[0.7],3q24q25.33(147043014_160322956)x1 [0.85],5p15.3p15.31(113576_9312391)x3[0.7],6q15q25.1(91354194_150242165)x 1[0.8],7p21.3p21.1(9058438_19836065)x0[0.7],7p21.1q36.3(19839465_159119707 )x3[0.7],8p23.3q12.1(168483_60290816)x2 hmz,8q12.1q24.12(60197960_122165704)x3[0.7], 8q24.12q24.22(122173681_136249330)x4[0.7],8q24.22q24.3(136250869_1462957 71)x3[0.7],9p24.3p13.1(203861_38787480)x3[0.7] hmz, 12p13.33q24.31(173786_120700268)x3[0.7],12q24.31(120707559_123661437)x1[ 0.7],12q24.31q24.33(123676131_133777902)x3[0.7],13q11q13.3(19436286_35959 599)x3[0.7],13q14.12q34(45647120_115107733)x3[0.7],18p11.32p11.21(2766336_ 15101911)x3[0.7],18q12.3q23(42088033_78014123)x3[0.7],19q13.2q13.43(425086 02_58956888)x4[0.7],20q13.2q13.33(53152594_62915555)x1[0.85],22q13.1q13.33 (37713571_51197838)x3[0.7] | 21             |
| LME-1                  | arr[GRCh37] (X)x1[0.8],1p13.2p11.2(112595773_120618050)x1[0.85],1q21.1q25.3(143932349_ 185080166)x4[0.85],1q25.3q44(185081909_249224684)x3[0.85], 3q11.1q29(93778974_197851986)x3[0.85],(4)x2 hmz,4q27q28.2(121090359_130798773)x1[0.85],4q32.3q35.2(165642090_190957 473)x1[0.85], 5p15.33q11.2(113576_56013926)x4[0.8],6p25.3q11.1(156974_62336066)x3[0.85],( 7)x3[0.85],8p23.3p11.1(168483_43778914)x2 hmz, 8q11.1q24.3(46839735_146295771)x3[0.85],11p15.5p11.12(198509_51563636)x2 hmz,11p11.12q25(51486091_134938470)x3[0.85],(13)x2 hmz, 13q31.2q34(89737577_115107733)x3[0.85],15q21.1q26.3(48589631_102429112)x 3[0.85],17p13.3q11.2(525_29287256)x3[0.85], 17q21.31q25.3(44841599_81041938)x3[0.85],19p13.3p13.11(260911_18432929)x 3[0.7],(20,21)x3[0.85]                                                                                                                                                                                                                               | 22             |
| Nalm-6 <i>TP53</i> KO  | arr[GRCh37] (1)x3[0.45],5q31.3q33.1(141262652_150060364)x1[0.9],(8)x1[0.45],(9p)x2 hmz,9p21.3(20314006_22342373)x0[0.9],(14)x1[0.4],(20)x3[0.25]                                                                                                                                                                                                                                                                                                                                                                                                                                                                                                                                                                                                                                                                                                                                                                                                                                                   | 7              |
| PGA-1 <i>TP53</i> KO#1 | arr[GRCh37] (2)x2 hmz,3q26.1q29(164122391_197851986)x3[0.8],(6)x1[0.45],(9)x1[0.15],(12)x3[0.35], 13q21.1q33.2(58063254_105702427)x3[0.75], (15)x2 hmz,16q11.2q24.3(46464488_90163275)x2 hmz,(18)x1[0.35]                                                                                                                                                                                                                                                                                                                                                                                                                                                                                                                                                                                                                                                                                                                                                                                          | 9              |
